# Supplementary material
Source: Springer Nature journal article supplement (https://www.springermedizin.de/resource/supplementary/13031_2011_86_MOESM4_ESM.pdf/9645070)

Severe Acute Malnutrition Rates and Therapeutic Feeding Program Enrollment, 2007-2009

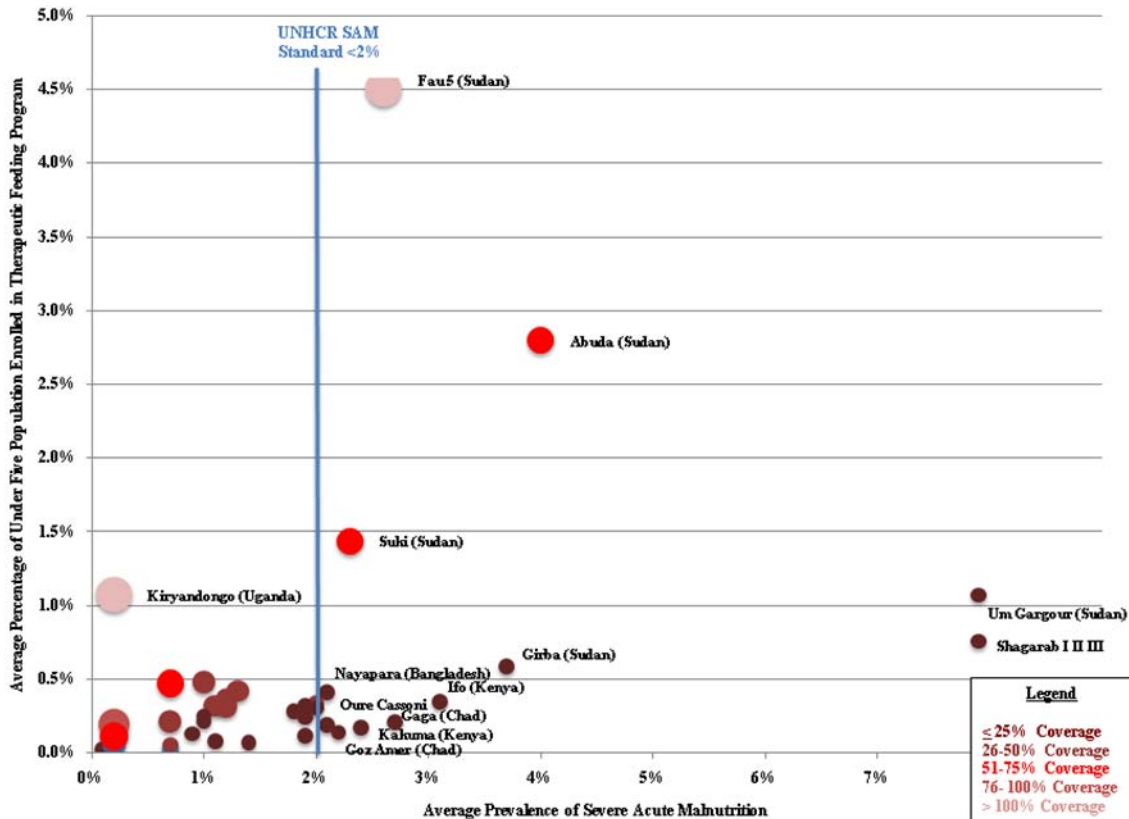

Supplement: MOESM4 [file 9645070]
